# Supplementary material for: In vitro fermentation profiles of undigested fractions from legume and nut particles are affected by particle cohesion and entrapped macronutrients
Source: Royal Society of Chemistry journal article supplement (doi:10.1039/d2fo00250g), 2022-01-01
Supplement: d2fo00250g1.pdf [file d2fo00250g1.pdf]

Electronic Supplementary Material (ESI) for Food & Function Journal.

This journal is © The Royal Society of Chemistry 2022

### Supplementary data

Table S1. Effect of substrates (UF) isolated from legumes on SCFA and NH<sub>4</sub><sup>+</sup> concentrations and their interaction with removal time during *in vitro* fermentation for 48 h.

| Substrates                            | Acetate           | Propio-<br>nate   | Butyrate          | Total<br>SCFA      | % of total SCFA     |                     |                     | BCR*               | NH <sub>4</sub> <sup>+</sup> |
|---------------------------------------|-------------------|-------------------|-------------------|--------------------|---------------------|---------------------|---------------------|--------------------|------------------------------|
|                                       |                   |                   |                   |                    | Acetate             | Propionate          | Butyrate            |                    |                              |
| (mmoles g <sup>-1</sup> DM)           |                   |                   |                   |                    |                     |                     |                     |                    |                              |
| <b>Legumes</b>                        |                   |                   |                   |                    |                     |                     |                     |                    |                              |
| <b>Chp</b>                            | 2.9 <sup>b</sup>  | 1.4 <sup>b</sup>  | 0.6 <sup>b</sup>  | 5.2 <sup>b</sup>   | 56.4 <sup>a</sup>   | 26.3 <sup>b</sup>   | 11.9 <sup>c</sup>   | 0.150 <sup>a</sup> | 3.4 <sup>b</sup>             |
| <b>Lent</b>                           | 3.4 <sup>a</sup>  | 1.8 <sup>a</sup>  | 1.0 <sup>a</sup>  | 6.5 <sup>a</sup>   | 54.8 <sup>b</sup>   | 27.1 <sup>a</sup>   | 13.9 <sup>a</sup>   | 0.118 <sup>b</sup> | 3.2 <sup>c</sup>             |
| <b>Mung</b>                           | 2.6 <sup>c</sup>  | 1.1 <sup>c</sup>  | 0.6 <sup>b</sup>  | 4.6 <sup>c</sup>   | 56.7 <sup>a</sup>   | 24.3 <sup>c</sup>   | 13.0 <sup>b</sup>   | 0.168 <sup>a</sup> | 3.6 <sup>a</sup>             |
| <b>Prob.</b>                          | <0.0001           | <0.0001           | <0.0001           | <0.0001            | <0.0001             | <0.0001             | <0.0001             | <0.0001            | <0.00                        |
| <b>MSD</b>                            | 0.21              | 0.10              | 0.05              | 0.36               | 0.81                | 0.59                | 0.40                | 0.02               | 0.13                         |
| <b>Removal time (h)</b>               |                   |                   |                   |                    |                     |                     |                     |                    |                              |
| <b>0</b>                              | 0.52 <sup>f</sup> | 0.22 <sup>f</sup> | 0.11 <sup>f</sup> | 0.89 <sup>f</sup>  | 56.72 <sup>a</sup>  | 24.76 <sup>c</sup>  | 12.99 <sup>ab</sup> | 0.05 <sup>d</sup>  | 1.95 <sup>f</sup>            |
| <b>4</b>                              | 0.86 <sup>f</sup> | 0.39 <sup>f</sup> | 0.19 <sup>f</sup> | 1.51 <sup>f</sup>  | 57.11 <sup>ab</sup> | 25.73 <sup>bc</sup> | 13.03 <sup>ab</sup> | 0.04 <sup>d</sup>  | 2.52 <sup>e</sup>            |
| <b>8</b>                              | 1.40 <sup>e</sup> | 0.62 <sup>e</sup> | 0.31 <sup>e</sup> | 2.47 <sup>e</sup>  | 56.56 <sup>b</sup>  | 24.86 <sup>cd</sup> | 12.71 <sup>bc</sup> | 0.19 <sup>b</sup>  | 3.42 <sup>c</sup>            |
| <b>12</b>                             | 1.93 <sup>d</sup> | 0.84 <sup>d</sup> | 0.42 <sup>d</sup> | 3.42 <sup>d</sup>  | 56.62 <sup>b</sup>  | 24.47 <sup>d</sup>  | 12.21 <sup>bc</sup> | 0.23 <sup>a</sup>  | 3.93 <sup>ab</sup>           |
| <b>15</b>                             | 2.66 <sup>c</sup> | 1.30 <sup>c</sup> | 0.58 <sup>c</sup> | 4.77 <sup>c</sup>  | 55.76 <sup>b</sup>  | 27.13 <sup>a</sup>  | 12.07 <sup>c</sup>  | 0.18 <sup>b</sup>  | 3.71 <sup>b</sup>            |
| <b>21</b>                             | 4.57 <sup>b</sup> | 2.15 <sup>b</sup> | 1.06 <sup>b</sup> | 8.16 <sup>b</sup>  | 55.99 <sup>b</sup>  | 26.20 <sup>ab</sup> | 12.96 <sup>ab</sup> | 0.14 <sup>c</sup>  | 3.11 <sup>d</sup>            |
| <b>48</b>                             | 5.58 <sup>a</sup> | 2.84 <sup>a</sup> | 1.44 <sup>a</sup> | 10.41 <sup>a</sup> | 53.75 <sup>c</sup>  | 27.17 <sup>a</sup>  | 13.64 <sup>a</sup>  | 0.16 <sup>bc</sup> | 4.17 <sup>a</sup>            |
| <b>Prob.</b>                          | <0.0001           | <0.0001           | <0.0001           | <0.0001            | <0.0001             | <0.0001             | <0.0001             | <0.0001            | <0.0001                      |
| <b>MSD</b>                            | 0.433             | 0.213             | 0.098             | 0.741              | 1.655               | 1.214               | 0.819               | 0.039              | 0.276                        |
| <b>Prob. Subst X<br/>Removal time</b> | <0.0001           | <0.0001           | <0.0001           | <0.0001            | <0.0001             | <0.0001             | <0.0001             | <0.0001            | 0.0007                       |

Table S2. Effect of substrates (UF) isolated from Nuts\_F and Nuts\_CC on SCFA and NH<sub>4</sub><sup>+</sup> concentrations and their interaction with removal time during *in vitro* fermentation for 48 h.

| Substrates                                | Acetate          | Propio-<br>nate   | Butyrate           | Total<br>SCFA     | % of total SCFA    |                    |                   | BCR*              | NH <sub>4</sub> <sup>+</sup> |
|-------------------------------------------|------------------|-------------------|--------------------|-------------------|--------------------|--------------------|-------------------|-------------------|------------------------------|
|                                           |                  |                   |                    |                   | Acetate            | Propionate         | Butyrate          |                   |                              |
| (mmol/g <sup>-1</sup> DM)                 |                  |                   |                    |                   |                    |                    |                   |                   |                              |
| <b>Nuts</b>                               |                  |                   |                    |                   |                    |                    |                   |                   |                              |
| <b>Alm</b>                                | 1.7 <sup>b</sup> | 0.9 <sup>b</sup>  | 0.3 <sup>b</sup>   | 3.2 <sup>b</sup>  | 55.1 <sup>a</sup>  | 25.9 <sup>b</sup>  | 11.2 <sup>a</sup> | 0.23 <sup>a</sup> | 3.8 <sup>a</sup>             |
| <b>Mac</b>                                | 1.6 <sup>c</sup> | 0.9 <sup>b</sup>  | 0.3 <sup>b</sup>   | 3.1 <sup>b</sup>  | 53.9 <sup>b</sup>  | 27.2 <sup>ab</sup> | 11.2 <sup>a</sup> | 0.23 <sup>a</sup> | 3.8 <sup>a</sup>             |
| <b>PNut</b>                               | 2.4 <sup>a</sup> | 1.3 <sup>a</sup>  | 0.4 <sup>a</sup>   | 4.3 <sup>a</sup>  | 55.0 <sup>a</sup>  | 27.6 <sup>a</sup>  | 10.6 <sup>b</sup> | 0.19 <sup>b</sup> | 3.9 <sup>a</sup>             |
| <b>Prob.</b>                              | <0.0001          | <0.0001           | <0.0001            | <0.0001           | <0.0001            | <0.0001            | <0.0001           | <0.0001           | <0.0001                      |
| <b>MSD</b>                                | 0.09             | 0.05              | 0.02               | 0.16              | 0.11               | 1.35               | 0.59              | 0.02              | 0.10                         |
| <b>Particle Size</b>                      |                  |                   |                    |                   |                    |                    |                   |                   |                              |
| <b>CC (Larger)</b>                        | 1.7 <sup>b</sup> | 0.9 <sup>b</sup>  | 0.3 <sup>a</sup>   | 3.2 <sup>b</sup>  | 54.2 <sup>a</sup>  | 25.9 <sup>b</sup>  | 11.7 <sup>a</sup> | 0.24 <sup>a</sup> | 4.0 <sup>a</sup>             |
| <b>F (Smaller)</b>                        | 2.1 <sup>a</sup> | 1.2 <sup>a</sup>  | 0.3 <sup>a</sup>   | 3.9 <sup>a</sup>  | 55.2 <sup>b</sup>  | 27.9 <sup>a</sup>  | 10.3 <sup>b</sup> | 0.20 <sup>b</sup> | 3.6 <sup>b</sup>             |
| <b>Prob.</b>                              | <0.0001          | <0.0001           | 0.6352             | <0.0001           | 0.0142             | <0.0001            | <0.0001           | <0.0001           | <0.0001                      |
| <b>MSD</b>                                | 0.06             | 0.04              | 0.02               | 0.11              | 0.76               | 0.92               | 0.40              | 0.01              |                              |
| <b>Removal time (h)</b>                   |                  |                   |                    |                   |                    |                    |                   |                   |                              |
| <b>0</b>                                  | 0.4 <sup>g</sup> | 0.19 <sup>f</sup> | 0.11 <sup>f</sup>  | 0.79 <sup>g</sup> | 56.8 <sup>ab</sup> | 24.4 <sup>c</sup>  | 13.9 <sup>a</sup> | 0.06 <sup>c</sup> | 2.2 <sup>e</sup>             |
| <b>4</b>                                  | 0.7 <sup>f</sup> | 0.33 <sup>e</sup> | 0.17 <sup>e</sup>  | 1.28 <sup>f</sup> | 56.6 <sup>ab</sup> | 25.7 <sup>bc</sup> | 13.4 <sup>a</sup> | 0.05 <sup>c</sup> | 2.9 <sup>d</sup>             |
| <b>8</b>                                  | 1.1 <sup>e</sup> | 0.40 <sup>e</sup> | 0.24 <sup>d</sup>  | 1.87 <sup>e</sup> | 58.5 <sup>a</sup>  | 21.0 <sup>d</sup>  | 12.9 <sup>a</sup> | 0.27 <sup>b</sup> | 3.6 <sup>c</sup>             |
| <b>12</b>                                 | 1.4 <sup>d</sup> | 0.59 <sup>d</sup> | 0.28 <sup>cd</sup> | 2.47 <sup>d</sup> | 55.8 <sup>b</sup>  | 23.9 <sup>c</sup>  | 11.4 <sup>b</sup> | 0.32 <sup>a</sup> | 4.1 <sup>b</sup>             |
| <b>15</b>                                 | 1.6 <sup>c</sup> | 0.73 <sup>c</sup> | 0.31 <sup>c</sup>  | 2.89 <sup>c</sup> | 55.4 <sup>b</sup>  | 25.0 <sup>c</sup>  | 10.9 <sup>b</sup> | 0.31 <sup>a</sup> | 4.2 <sup>b</sup>             |
| <b>21</b>                                 | 2.6 <sup>b</sup> | 1.32 <sup>b</sup> | 0.37 <sup>b</sup>  | 4.67 <sup>b</sup> | 55.6 <sup>b</sup>  | 27.8 <sup>b</sup>  | 8.2 <sup>c</sup>  | 0.25 <sup>b</sup> | 4.1 <sup>b</sup>             |
| <b>48</b>                                 | 3.2 <sup>a</sup> | 1.99 <sup>a</sup> | 0.57 <sup>a</sup>  | 6.29 <sup>a</sup> | 50.7 <sup>c</sup>  | 31.8 <sup>a</sup>  | 9.3 <sup>c</sup>  | 0.24 <sup>b</sup> | 4.6 <sup>a</sup>             |
| <b>Prob.</b>                              | <0.0001          | <0.0001           | <0.0001            | <0.0001           | <0.0001            | <0.0001            | <0.0001           | <0.0001           | <0.0001                      |
| <b>MSD</b>                                | 0.19             | 0.111             | 0.050              | 0.34              | 2.28               | 2.78               | 1.21              | 0.031             | 0.22                         |
| <b>Prob. Subst<br/>X Removal<br/>time</b> | <0.0001          | <0.0001           | 0.0024             | <0.0001           | <0.0001            | 0.0001             | 0.0387            | <0.0001           | <0.0001                      |

\*BCR = Ratio of branched-chain fatty acids (iso-butyrate, iso-valerate) and n-valerate to straight-chain fatty acids (acetate, propionate, butyrate)

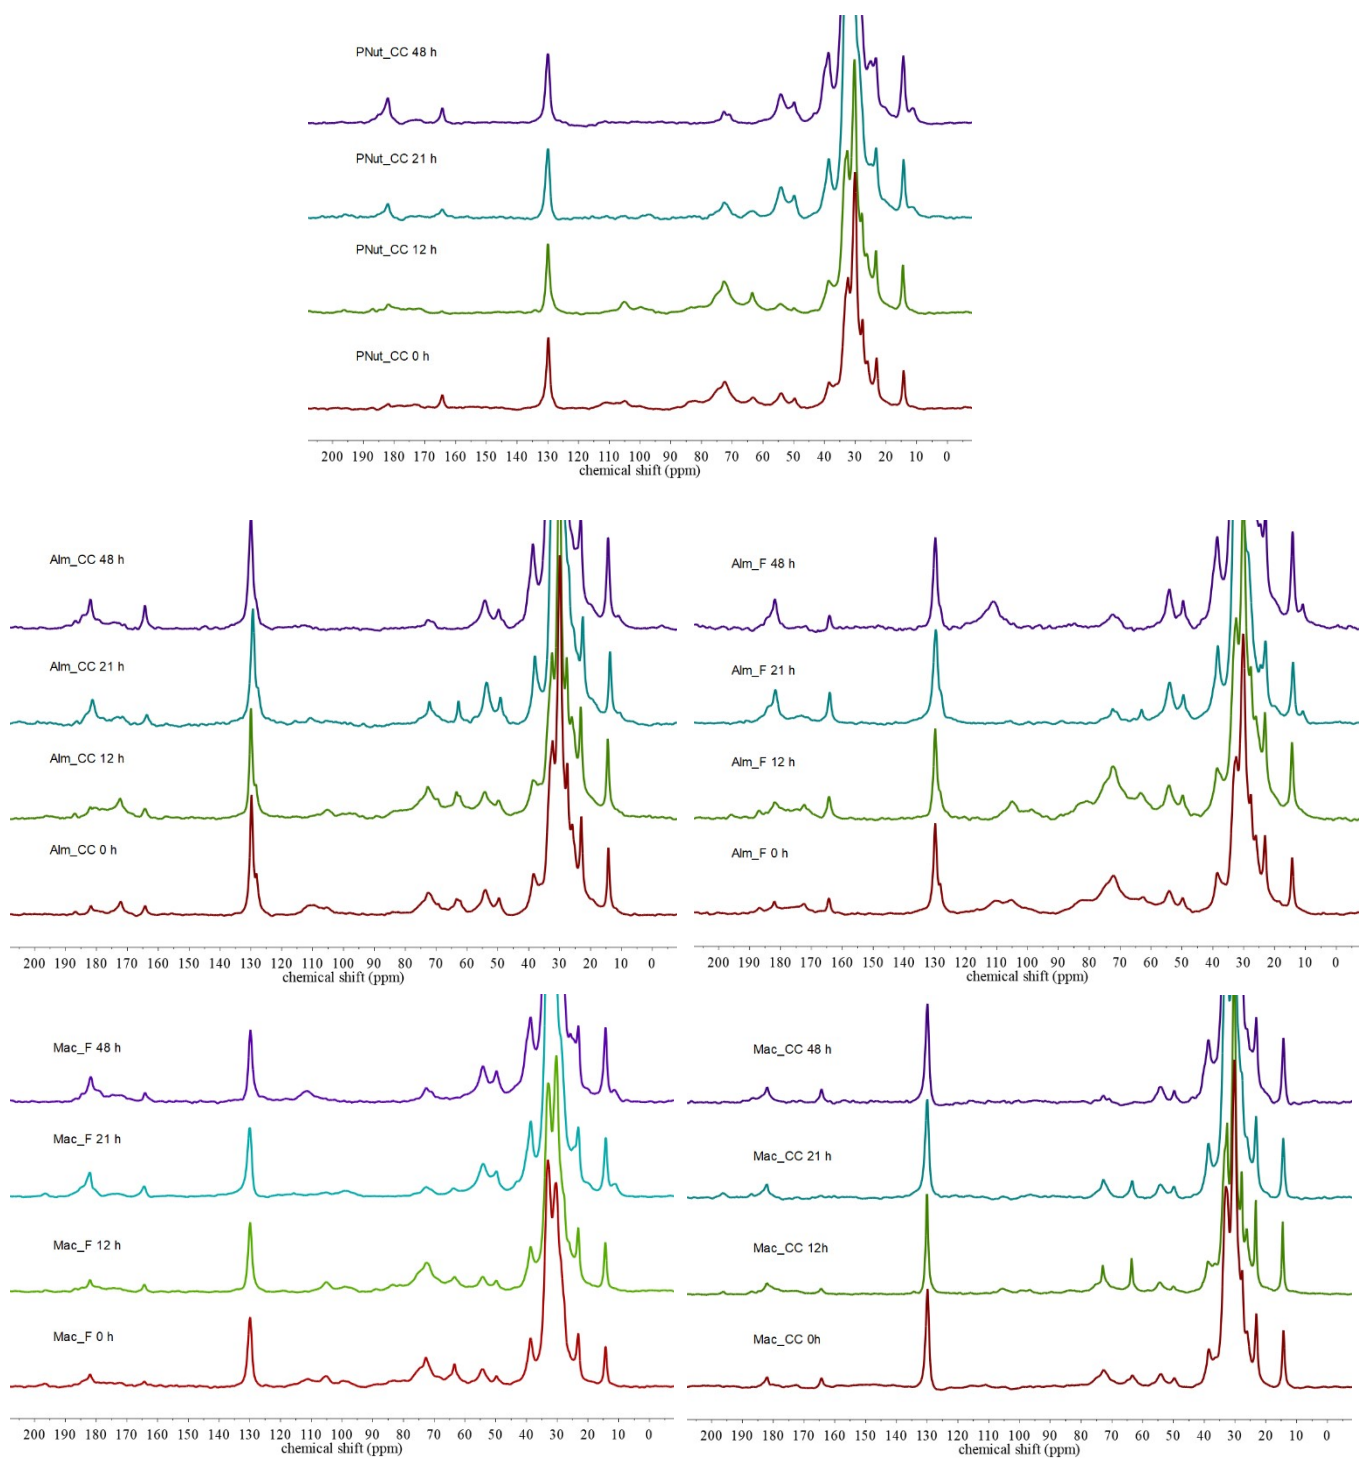

Fig S1. Solid-state  $^{13}\text{C}$  CPSP/MAS NMR spectra of Nuts\_F and Nuts\_CC residues after 0, 12, 21 or 48h fermentation (equivalent spectra for PNut\_F are shown in Fig 4)

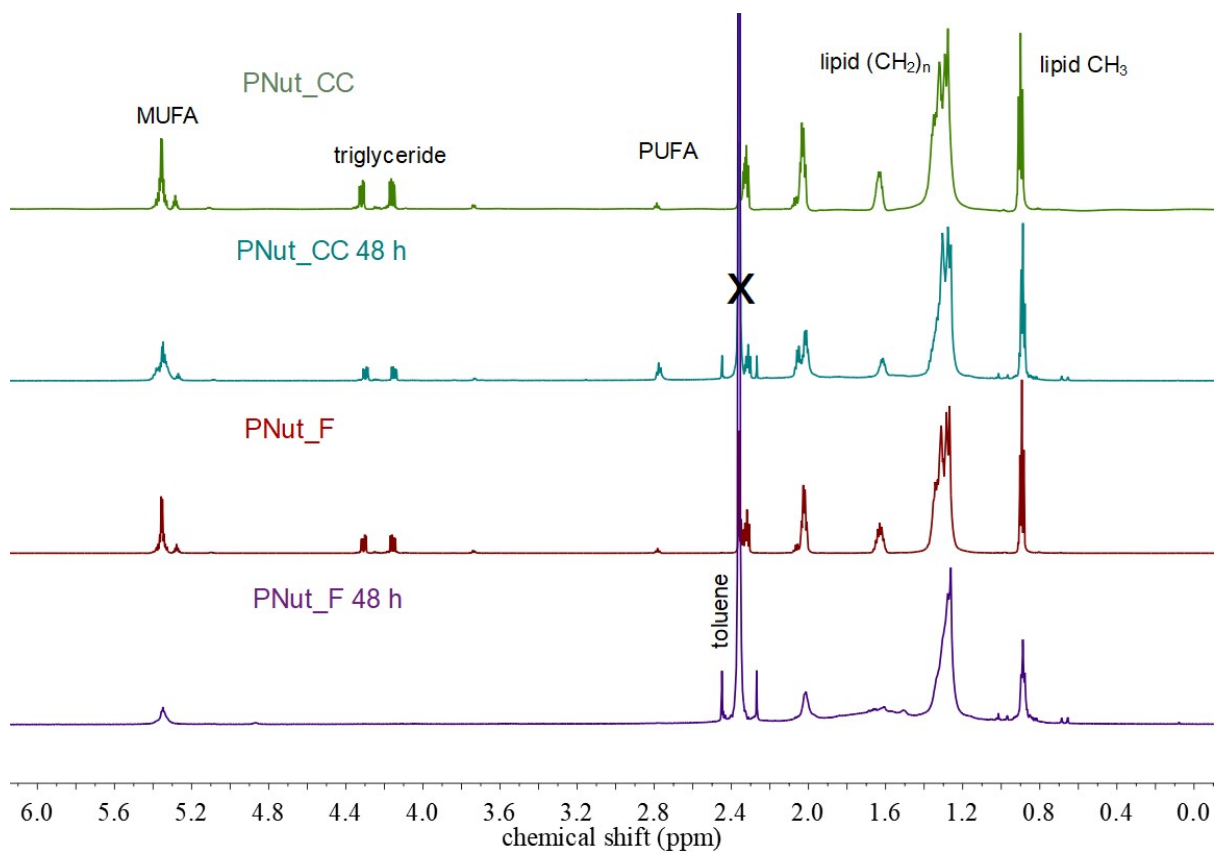

Fig S2. <sup>1</sup>H Solution-state NMR spectra of PNut\_F (250-500 μm) and PNut\_CC (710-1000 μm) before and after 48h fermentation.

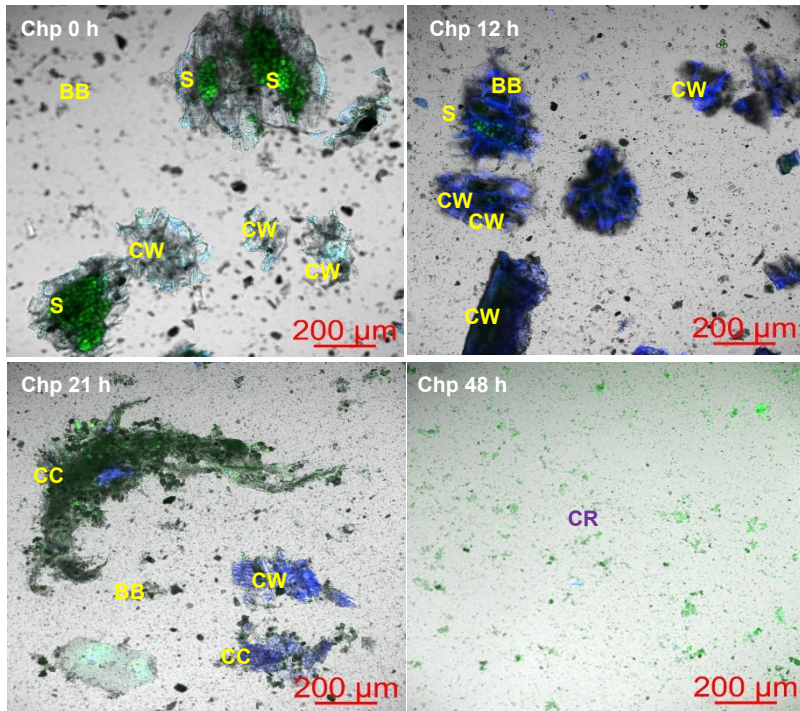

Fig S3. Microstructure features of Chp\_F after *in vitro* fermentation for 0, 12, 21 and 48h. S = starch; CW = cell walls; CC = cell clusters; BB = bacterial biomass; CR=cell remnants

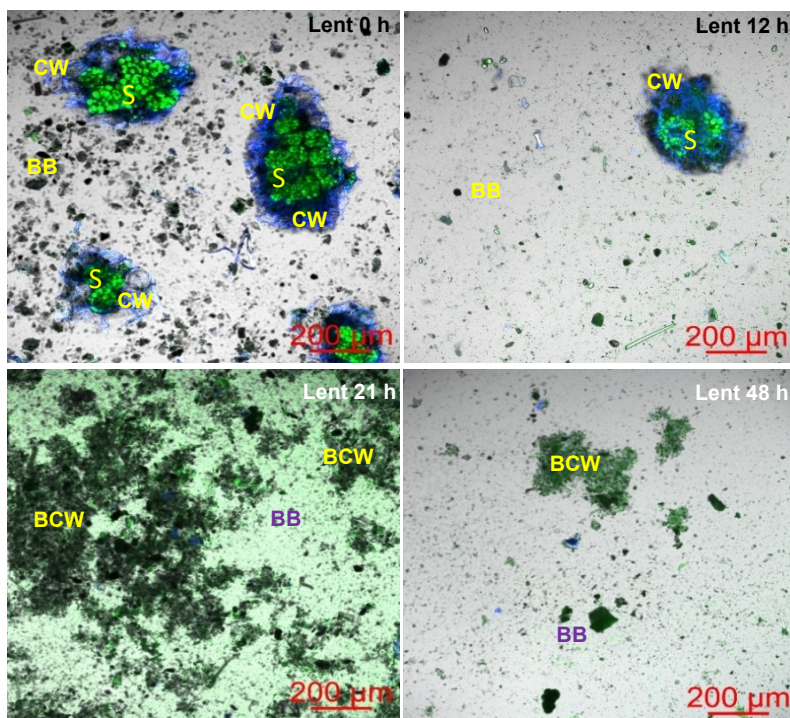

Fig S4. Microstructure features of Lent after 0, 12, 21 and 48h *in vitro* fermentation. CW = cell walls; S = starch; BB = bacterial biomass; BCW = broken cell walls

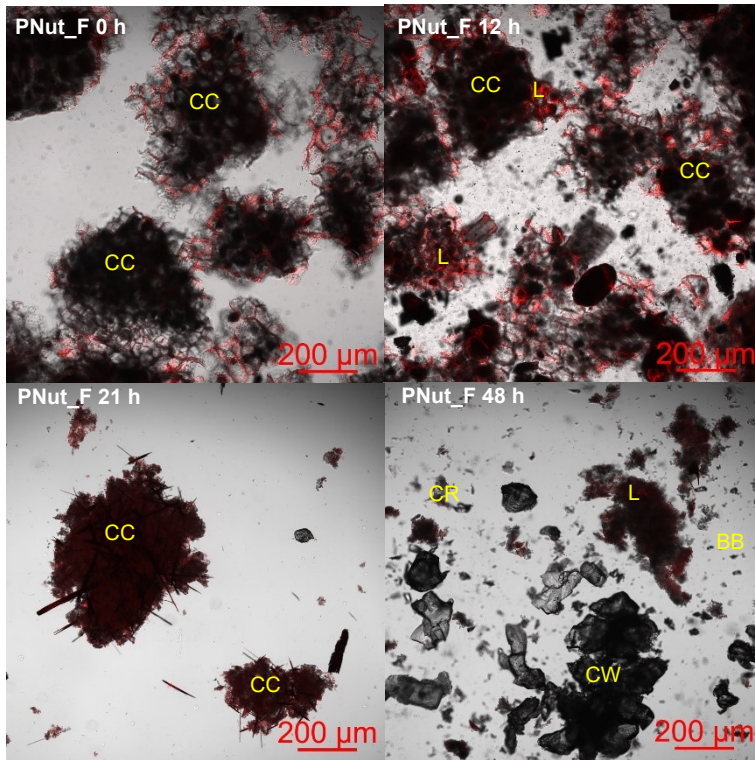

Fig S5. Microstructure features of PNut\_F after 0, 12, 21 and 48h *in vitro* fermentation. L = lipid; CW=cell walls; CC = cell clusters; BB = bacterial biomass; CR = cell remnants

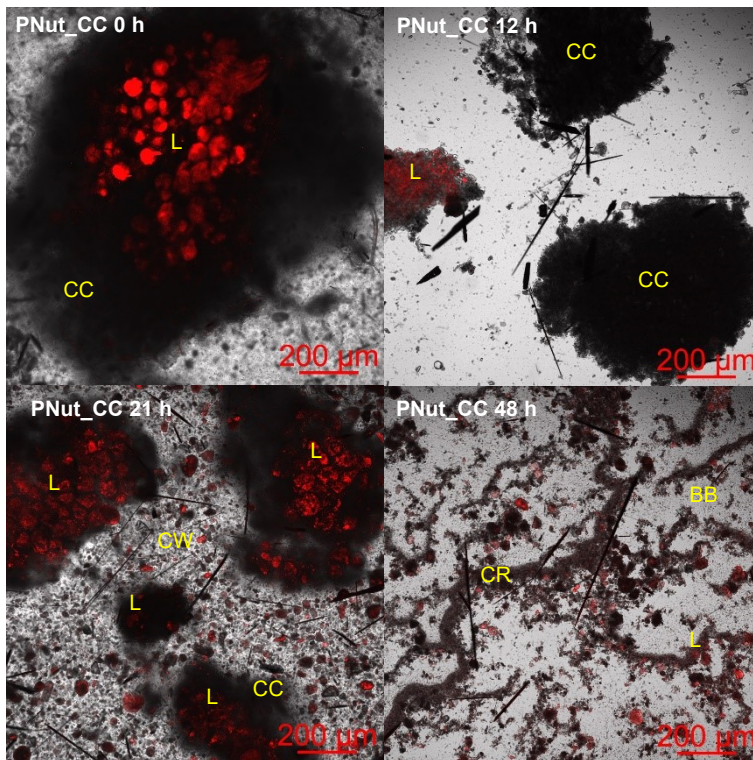

Fig S6. Microstructure features of PNut\_CC after 0, 12, 21 and 48h *in vitro* fermentation. L = lipid; CW = cell walls; CC = cell clusters; BB = bacterial biomass; CR = cell remnants

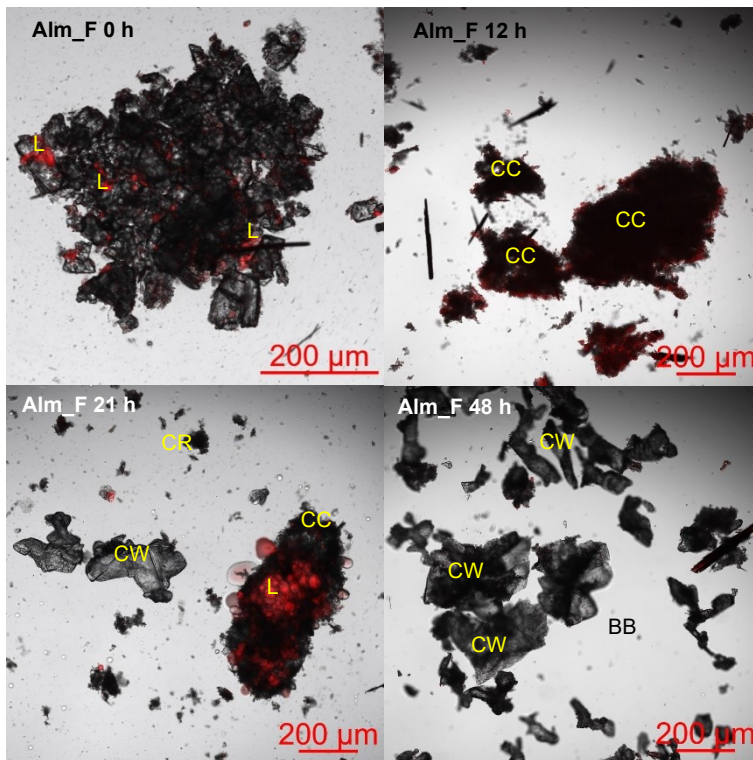

Fig S7. Microstructure features of Alm\_F after 0, 12, 21 and 48h *in vitro* fermentation. L = lipid; CW = cell walls; CC = cell clusters; BB = bacterial biomass; CR = cell remnants

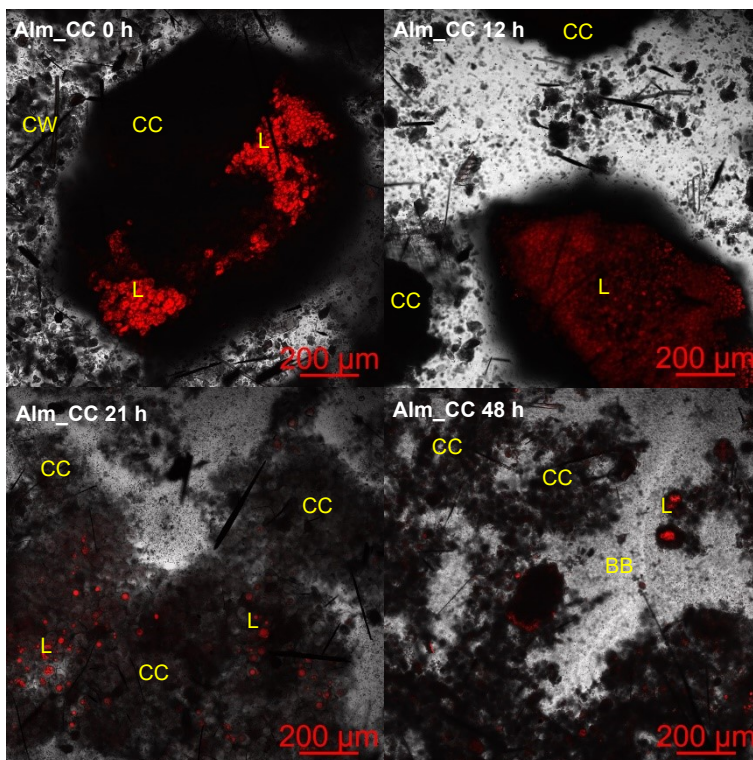

Fig S8. Microstructure features of Alm\_CC after 0, 12, 21 and 48h *in vitro* fermentation. L = lipid; CW = cell walls; CC = cell clusters; BB = bacterial biomass; CR = cell remnants
